# Supplementary material for: Effect of tolytoxin on tunneling nanotube formation and function
Source: PubMed Central journal article supplement (PMC6450976; doi:10.1038/s41598-019-42161-6), 2019-04-05

# 1 **Effect of tolytoxin on tunneling nanotube formation and function**

2  
3 Aysegul Dilsizoglu Senol<sup>1</sup>, Anna Pepe<sup>1</sup>, Clara Grudina<sup>1</sup>, Nathalie Sassoon<sup>2</sup>, Ueoka Reiko<sup>3</sup>, Luc  
4 Bousset<sup>4</sup>, Ronald Melki<sup>4</sup>, Jörn Piel<sup>3</sup>, Muriel Gugger<sup>2\*</sup>, Chiara Zurzolo<sup>1\*</sup>

5  
6 <sup>1</sup>Institut Pasteur, Unité Trafic Membranaire et Pathogenèse, 25–28 Rue du Docteur Roux,  
7 75724 Paris CEDEX 15, France. <sup>2</sup>Institut Pasteur, Collection des Cyanobactéries, 25–28 Rue  
8 du Docteur Roux, 75724 Paris CEDEX 15, France. <sup>3</sup>Institute of Microbiology, Eigenössische  
9 Technische Hochschule (ETH) Zurich, Vladimir-Prelog-Weg 4, 8093 Zurich, Switzerland.  
10 <sup>4</sup>Paris-Saclay Institute of Neuroscience, CNRS, 1 Avenue de la Terrasse, 91190 Gif-sur-Yvette,  
11 France. \*Correspondence and requests for materials should be addressed to MG  
12 (muriel.gugger@pasteur.fr) or CZ (chiara.zurzolo@pasteur.fr).

## 15 **Supplementary material**

### 16 **Methods**

#### 17 **Co-Culture Experiments**

##### 18 *Co-culture preparation for DiD vesicle transfer experiments*

19 SW13 cells (donor) were plated on 35 mm dishes (Falcon) and treated with 3 nM tolytoxin or  
20 3 nM methanol for 18 h in parallel to non-treated control cells. Then they were incubated with  
21 vybrant DiD cell labeling solution (Thermo Fisher Scientific) (1:2000 in complete medium) for  
22 45 min at 37 °C to label vesicle membranes. Cells were washed three times with 0.01% trypsin  
23 to remove unbound dye. In parallel, SW13 cells (acceptor) were plated on T25 flasks and  
24 transfected with 3 µg of H2B-mCherry plasmid. Donor and acceptor cells were trypsinized,  
25 centrifuged (1000 rpm, 4 min), counted and co-cultured on 35 mm Ibidi µ-dishes for 24 h with  
26 1:1 ratio (120.000 donor-120.000 acceptor). Same ratio was used for all co-culture preparations  
27 in SW13 cells (Supplementary Fig. S4a). Cells were then fixed with 4% of PFA for 20 min at  
28 RT. After several washes with PBS, cells were stained with HCS Cell Mask<sup>TM</sup> Blue Stain  
29 (Invitrogen, 1:5000) in PBS1X for 20 min and DAPI (1:5000) at RT for 5 min and then  
30 mounted. Image stacks (0.5 µm) covering the whole cellular volume were acquired using a  
31 confocal-microscope (Zeiss LSM700) with a 63X objective controlled by ZEN software for all  
32 co-culture experiments. Images were quantified for (i) the number of acceptor cells which had  
33 received the DiD labeled vesicles and (ii) the number of DiD labeled vesicles per acceptor cell.

34 Acceptor cells having DiD vesicles were detected by a script written for detection of cells  
35 having two colors (i.e. red and far red for acceptor cells and DiD labeled vesicles respectively).  
36 Number of DiD vesicles per acceptor cell were automatically counted by spot detector  
37 integrated into the same script. This script produced in ICY software was applied to all co-  
38 culture experiments by adjusting the color settings.

#### 39 *Secretion test*

40 To evaluate the possibility of DiD labeled vesicle transfer from donor to acceptor cells mediated  
41 by secretion, donor cells were loaded with DiD, washed with 0.01% trypsin, cultivated into  
42 fresh medium and incubated for 24 h. Conditioned medium collected from these cells was  
43 centrifuged at 1000 rpm for 4 min to remove floating cells and added on acceptor cells. After  
44 24 h, cells were fixed with 4% PFA at RT for 20 min. After image acquisition, acceptor cells  
45 were counted for the presence of DiD positive vesicles. Secretion test was performed in parallel  
46 to all the co-culture experiments performed in this study by following the same protocol  
47 (Supplementary Fig. S4e).

#### 48 *Co-culture preparation for mitochondria transfer experiments*

49 For SW13 cells, donor population were plated on T25 flasks (800.000 cells) and transfected  
50 with 3 µg of Mito-GFP for 24 h. Transfected cells were plated on 35 mm dishes and treated  
51 with 3 nM tolytoxin or 3 nM methanol for 18 h or left untreated. Meanwhile, acceptor cells  
52 were plated on T25 flasks and transfected with 3 µg H2B-mCherry plasmid. For SH-SY5Y  
53 cells, stable cell line expressing Mito-DsRed was used as donor population and cells were  
54 directly plated on 35 mm dishes and treated with 15 nM tolytoxin or 15 nM methanol for 18h  
55 or left untreated. As acceptor cell population, stable cell line expressing H2B-GFP was used.  
56 Donor and acceptor cells were mixed in 1:1 ratio (same concentration used in DiD transfer was  
57 applied to SW13 cells and 50.000 donors and 50.000 acceptor SH-SY5Y cells were plated on  
58 12 mm glass coverslips) and co-cultured for 24 h (Supplementary Figs. S4b, c). After fixation  
59 with 4% PFA min at RT for 20, cells were stained for WGA Alexa Fluor®-647 nm (1:300)  
60 conjugate and DAPI prior to mounting. After image acquisition, number of acceptor cells,  
61 which had received mitochondria and the number of mitochondria received per acceptor cell  
62 were quantified. In parallel, secretion of mitochondria was also tested. Briefly, supernatant  
63 collected from the conditioned medium of SW13 donor cells (Mito-GFP transfected) and SH-  
64 SY5Y donor cells (Mito-DsRed expressing cells) were added onto acceptor cell populations  
65 (H2B-mCherry transfected SW13 cells or H2B-GFP expressing SH-SY5Y cells). Acceptor  
66 cells were then analysed for the presence of Mito-GFP.

67

68 *Co-culture preparation for  $\alpha$ -syn fibril transfer experiments*

69 1  $\mu$ M of ATTO-550 tagged  $\alpha$ -syn fibrils were diluted in SH-SY5Y cell culture medium and  
70 sonicated for 5 min at 80% amplitude with a pulse cycle of 5 seconds on and 2 seconds off in a  
71 Vibra-Cell 75041 ultrasonic water bath (Bioblocks Scientific) and immediately transferred on  
72 cultured SH-SY5Y and incubated 18 h. Cells were further washed with PBS and 0.01% trypsin  
73 (3 times) in order to eliminate non-internalized fibrils, prior to be treated with 15 nM of  
74 tolytoxin or methanol for 18 h in parallel to control cells. These cells were used as donor  
75 population in co-culture experiments whereas GFP transfected SH-SY5Y cells were used as  
76 acceptor population (Supplementary Fig. S4d). After cells were co-cultured for 24 h, they were  
77 fixed with 4% PFA 20 min at RT and stained for WGA Alexa Fluor<sup>®</sup>-647 and DAPI and then  
78 mounted. Acceptor cells received  $\alpha$ -syn fibrils and the number of  $\alpha$ -syn puncta per acceptor cell  
79 were then quantified in parallel to secretion test.

80

81 **Supplementary Table-1.** Percentage of TNT-connected cells for both cell types. Mean  
82 percentage of TNT-connected cells and the standard error of the mean for two sets of TNT  
83 counting experiments (three independent experiments for one set of experiment) performed for  
84 SW13 and one set of experiment (three independent experiments) performed for SH-SY5Y  
85 cells.

| <b>SW13</b>      | <b>TNT-connected cells (%)</b>   |
|------------------|----------------------------------|
| Control          | 48.37 $\pm$ 4.168                |
| 0.5 nM methanol  | 46.8 $\pm$ 3.998                 |
| 0.5 nM tolytoxin | 45.17 $\pm$ 4.945                |
| 1.5 nM methanol  | 53.9 $\pm$ 5.376                 |
| 1.5 nM tolytoxin | 40.69 $\pm$ 4.251                |
| 3 nM methanol    | 50.33 $\pm$ 3.604                |
| 3 nM tolytoxin   | 29.23 $\pm$ 4.371                |
|                  |                                  |
| Control          | 44.24 $\pm$ 3.659                |
| 5 nM methanol    | 39.8 $\pm$ 5.106                 |
| 5 nM tolytoxin   | 20.19 $\pm$ 6.75                 |
| 10 nM methanol   | 35 $\pm$ 9.68                    |
| 10 nM tolytoxin  | 17.55 $\pm$ 5.044                |
| 20 nM methanol   | 33.4 $\pm$ 7.891                 |
| 20 nM tolytoxin  | 15.75 $\pm$ 5.429                |
|                  |                                  |
| <b>SH-SY5Y</b>   | <b>TNT-connected cells c (%)</b> |
| Control          | 43.16 $\pm$ 2.148                |
| 3 nM methanol    | 44 $\pm$ 5.494                   |
| 3 nM tolytoxin   | 40.16 $\pm$ 4.018                |
| 5 nM methanol    | 39.23 $\pm$ 3.085                |
| 5 nM tolytoxin   | 37.61 $\pm$ 3.656                |
| 15 nM methanol   | 46.37 $\pm$ 2.822                |
| 15 nM tolytoxin  | 32.53 $\pm$ 2.489                |

86 **Supplementary Figure S1.** Comparison of tolytoxin and luminaolide B biosynthesis gene  
87 clusters.

88 **a)** Gene cluster conservation and rearrangement in four strains producing tolytoxin or  
89 luminaolide B. Named accordingly to the reference gene cluster of *Scytonema* sp. PCC 10023,  
90 the tolytoxin gene clusters include one acyltransferase (*ttoA*), one thioesterase (*ttoH*) and four  
91 to five *trans* AT-PKS and (*tto C-F*) indicated in blue, one cytochrome P450 gene (*ttoG*) in  
92 green, permease and transporter (brown), transposase (yellow), and other genes with unknown  
93 function (white). The grey shadowed areas link conserved genes between the four pathways  
94 according to phylogeny of the KS genes, which highlight the rearrangement of the cluster from  
95 one strain to another. **b)** Spectrometry and purity check of tolytoxin from *Planktothrix*  
96 *paucivesiculata* PCC 8926, Mass spectrum of the peak at 17.64 min from PCC 8926 ( $m/z$   
97 872.51  $[M+Na]^+$ ,  $m/z$  832.52  $[M+H-H_2O]^+$ ,  $m/z$  814.51  $[M+H-2H_2O]^+$ ). **c)** Purity of the  
98 tolytoxin extracted from PCC 8926 used for this study.  $^1H$  NMR data of tolytoxin (upper) and  
99 PCC 8926-Fr.3 (lower) in acetone- $d_6$  at 298 K.

100  
101  
102  
103  
104  
105  
106  
107  
108  
109  
110  
111  
112  
113  
114  
115  
116  
117

# Supplementary Figure-S1

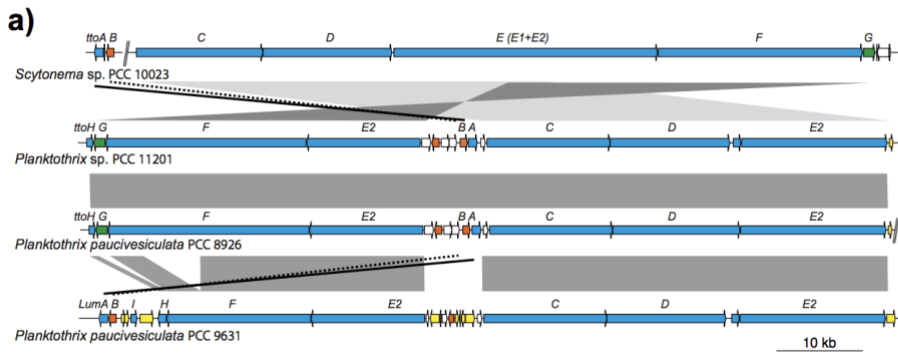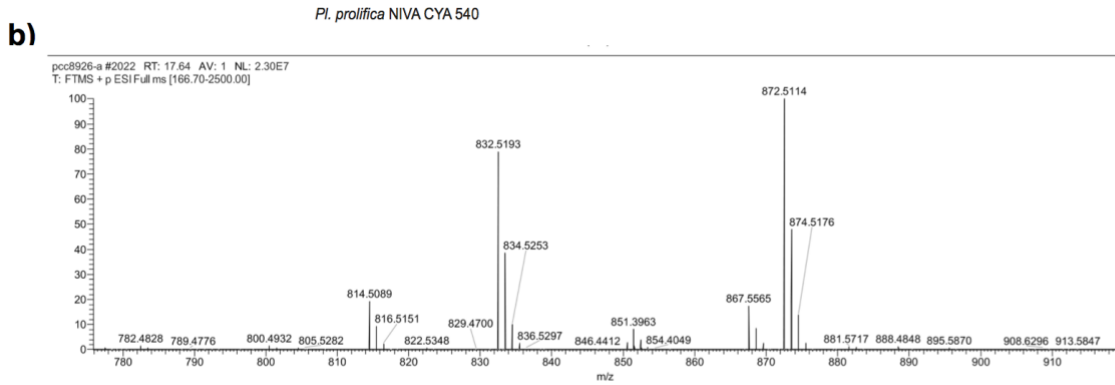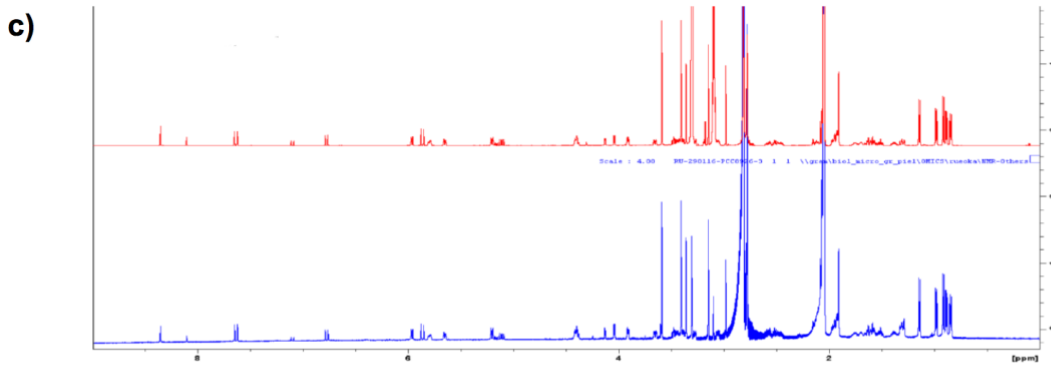

118  
119  
120  
121  
122  
123  
124  
125

126 **Supplementary Figure S2.** Increase in Pan-actin / F-actin ratio in the presence of tolytoxin,  
127 TNTs without cargo and having either mitochondria or  $\alpha$ -syn in Z-stacks. Effect of tolytoxin  
128 on actin cytoskeleton in SKOV-3 cells

129 **a)** F- and Pan-actin labeling for Control, 100 nM Me-control and 100 nM tolytoxin treated  
130 SW13 and SHSY-5Y cells. Arrows indicate increased G-actin labelling. Scale bar: 10  $\mu$ m. **b)**  
131 upper graph: Pan Actin/F actin ratio in SW13 cells; Control:  $0.28 \pm 0.01$ , Me-Control:  $0.58 \pm$   
132  $0.02$ , 3 nM tolytoxin:  $1.29 \pm 0.17$  ( $p=0.06$  for control *versus* 3 nM Me-control,  $p<0.0001$  for  
133 control *versus* 3 nM tolytoxin,  $p<0.0001$  for 3 nM Me-control *versus* 3 nM tolytoxin). Lower  
134 graph: Pan Actin/F actin ratio in SH-SY5Y cells; Control:  $0.55 \pm 0.01$ , Me-Control:  $0.6 \pm 0.02$ ,  
135 15 nM tolytoxin:  $0.88 \pm 0.04$  ( $p=0.68$  for control *versus* 15 nM Me-control,  $p<0.0001$  for  
136 control *versus* 15 nM tolytoxin,  $p<0.0001$  for 15 nM Me-control *versus* 15 nM tolytoxin). Data  
137 were collected from three independent experiments; 40 cells were analysed per condition. **c)**  
138 Sequential image sections of TNTs from upper slices to bottom slice in SW13 and SHSY-5Y  
139 cells. Arrows indicate TNTs forming from upper sections and disappearing in bottom sections.  
140 Scale bar: 10  $\mu$ m. **d)** Bottom and upper sections of mitochondria (MitoDsred) and WGA Alexa  
141 488 labeled SH-SY5Y cells. White arrow indicates mitochondria inside of a TNT visible only  
142 in upper section. Selected area (indicated with white rectangle) is presented in 3D in a different  
143 angle, WGA Alexa 488 is pseudo-colored in grey (Left). Bottom and upper sections of Atto  
144 550 tagged  $\alpha$ -syn fibrils and WGA Alexa 488 labeling in SH-SY5Y cells. White arrow indicates  
145  $\alpha$ -syn inside of a TNT visible only in upper section. Selected area (indicated with white  
146 rectangle) is presented in 3D in a different angle, WGA Alexa 488 is pseudo-colored in grey in  
147 both IF and 3D representation (Right). Scale bars: 10  $\mu$ m for IF images and 5  $\mu$ m for 3D  
148 presentations). **e)** Orthogonal view of mitochondria transferred into the cytoplasm of an  
149 acceptor cell in SH-SY5Y co-culture. Scale bar: 10  $\mu$ m. **f)** Rhodamine-phalloidin labeling in  
150 SKOV-3 cells in Control, 3 nM and 15 nM methanol or tolytoxin treated cells. Arrows indicate  
151 intact actin filaments. Scale bar: 20  $\mu$ m.

152

153

154

155

156

**Supplementary Figure-S2**

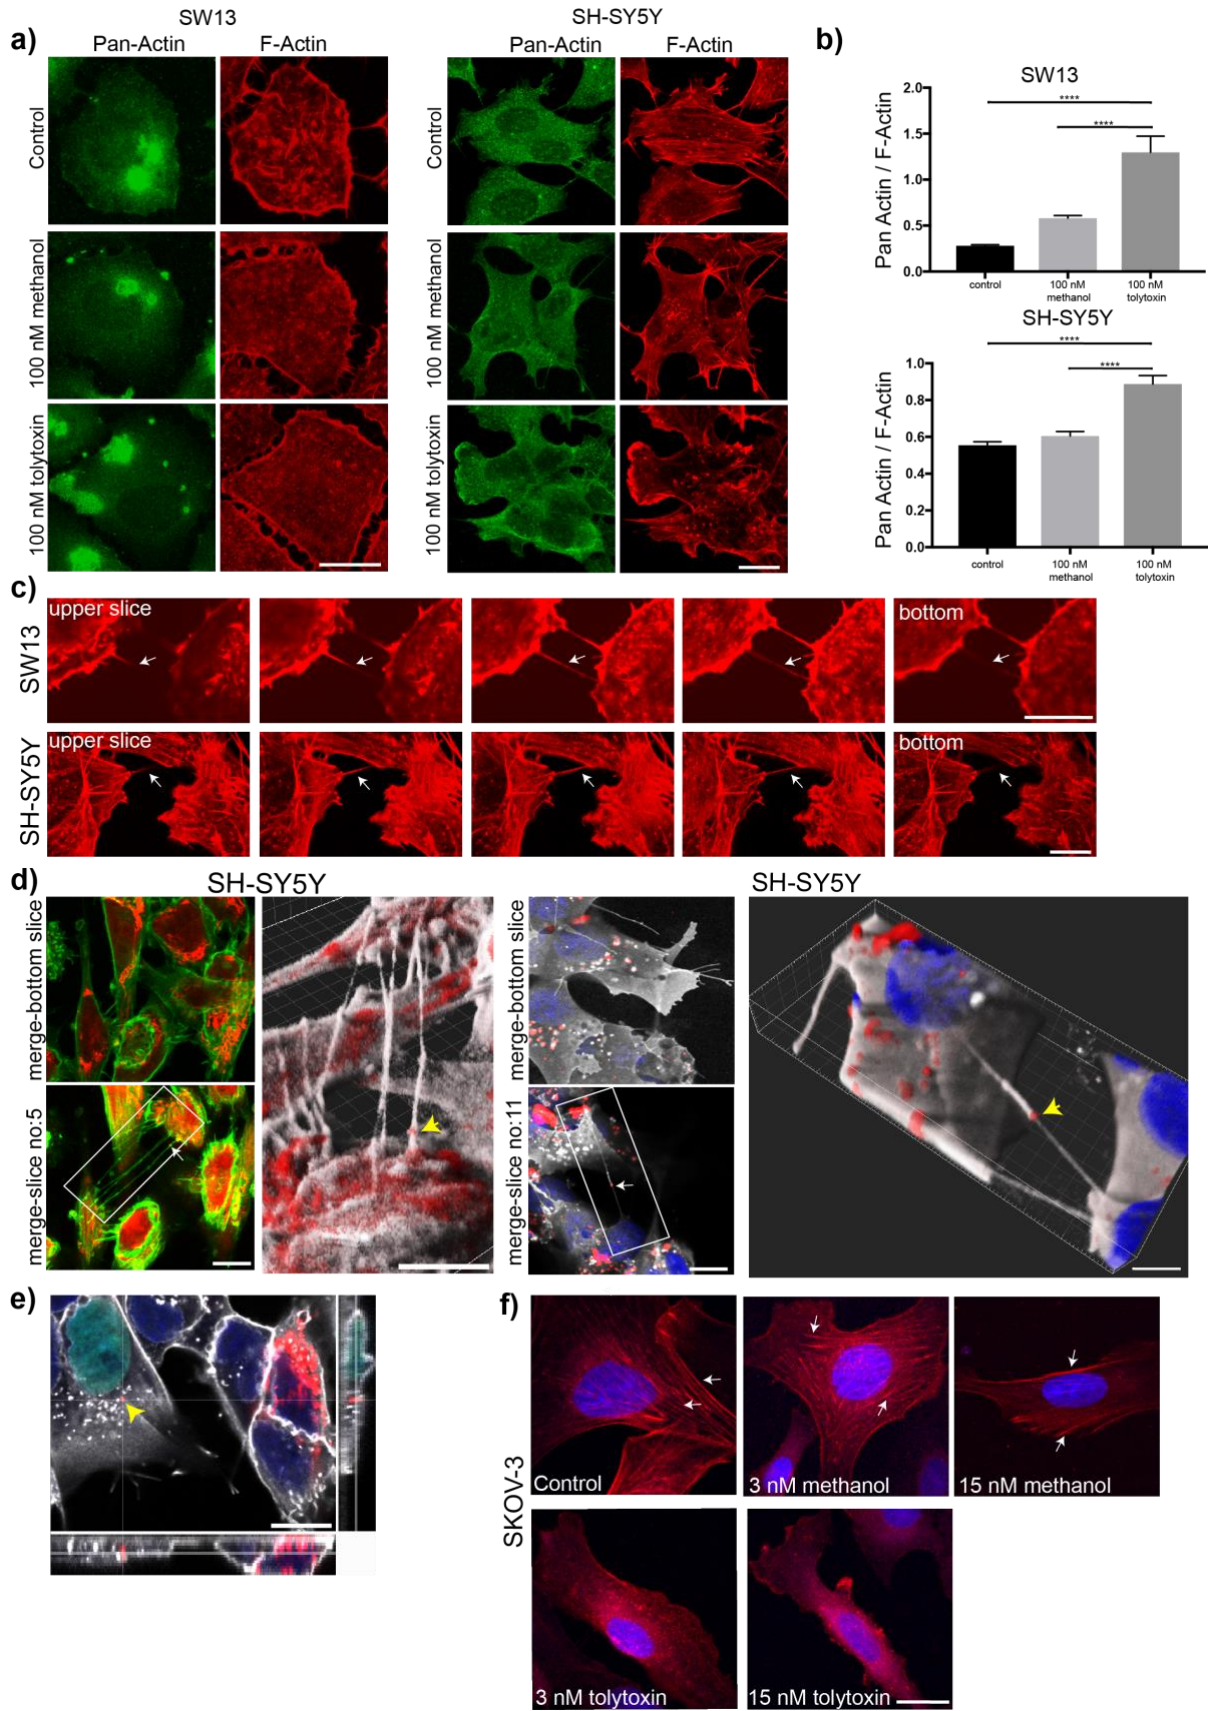

157  
158  
159

160 **Supplementary Figure S3.** Effect of tolytoxin on filopodia formation.

161 **a)** Attached filopodia detection in SW13 cells. Control, Me-Control and 3 nM tolytoxin treated  
162 cells labelled with vinculin, HCS Cell Mask<sup>TM</sup> Blue Stain and DAPI. **b)** Graph showing the  
163 average number of attached filopodia quantification in SW13 cells. Mean number of attached  
164 filopodia in Control:  $88.32 \pm 4.16$ , Me-control:  $78.73 \pm 3.17$ , 3 nM tolytoxin:  $86.94 \pm 3.08$   
165 ( $p=0.141$  for control *versus* 3 nM Me-control,  $p=0.956$  for control *versus* 3 nM tolytoxin,  
166  $p=0.231$  for 3 nM Me-control *versus* 3 nM tolytoxin). **c)** Attached filopodia detection in SH-  
167 SY5Y cells. Control, Me-Control and 15 nM tolytoxin treated SH-SY5Y cells labelled with  
168 vinculin, rhodamine phalloidine and DAPI. **d)** Graph showing the average number of attached  
169 filopodia in Control:  $43.41 \pm 3.89$ , Me-control:  $57,85 \pm 6.66$ , 15 nM tolytoxin:  $39.42 \pm 3.34$   
170 ( $p=0.09$  for control *versus* 15 nM Me-control,  $p=0.832$  for control *versus* 15 nM tolytoxin,  
171  $p=0.06$  for 15 nM Me-control *versus* 15 nM tolytoxin). Data were collected from three  
172 independent experiments; 40 cells were analysed per condition. Scale bar: 10  $\mu\text{m}$ .

173

174

175

176

177

178

179

180

181

182

183



**Supplementary Figure-S3**

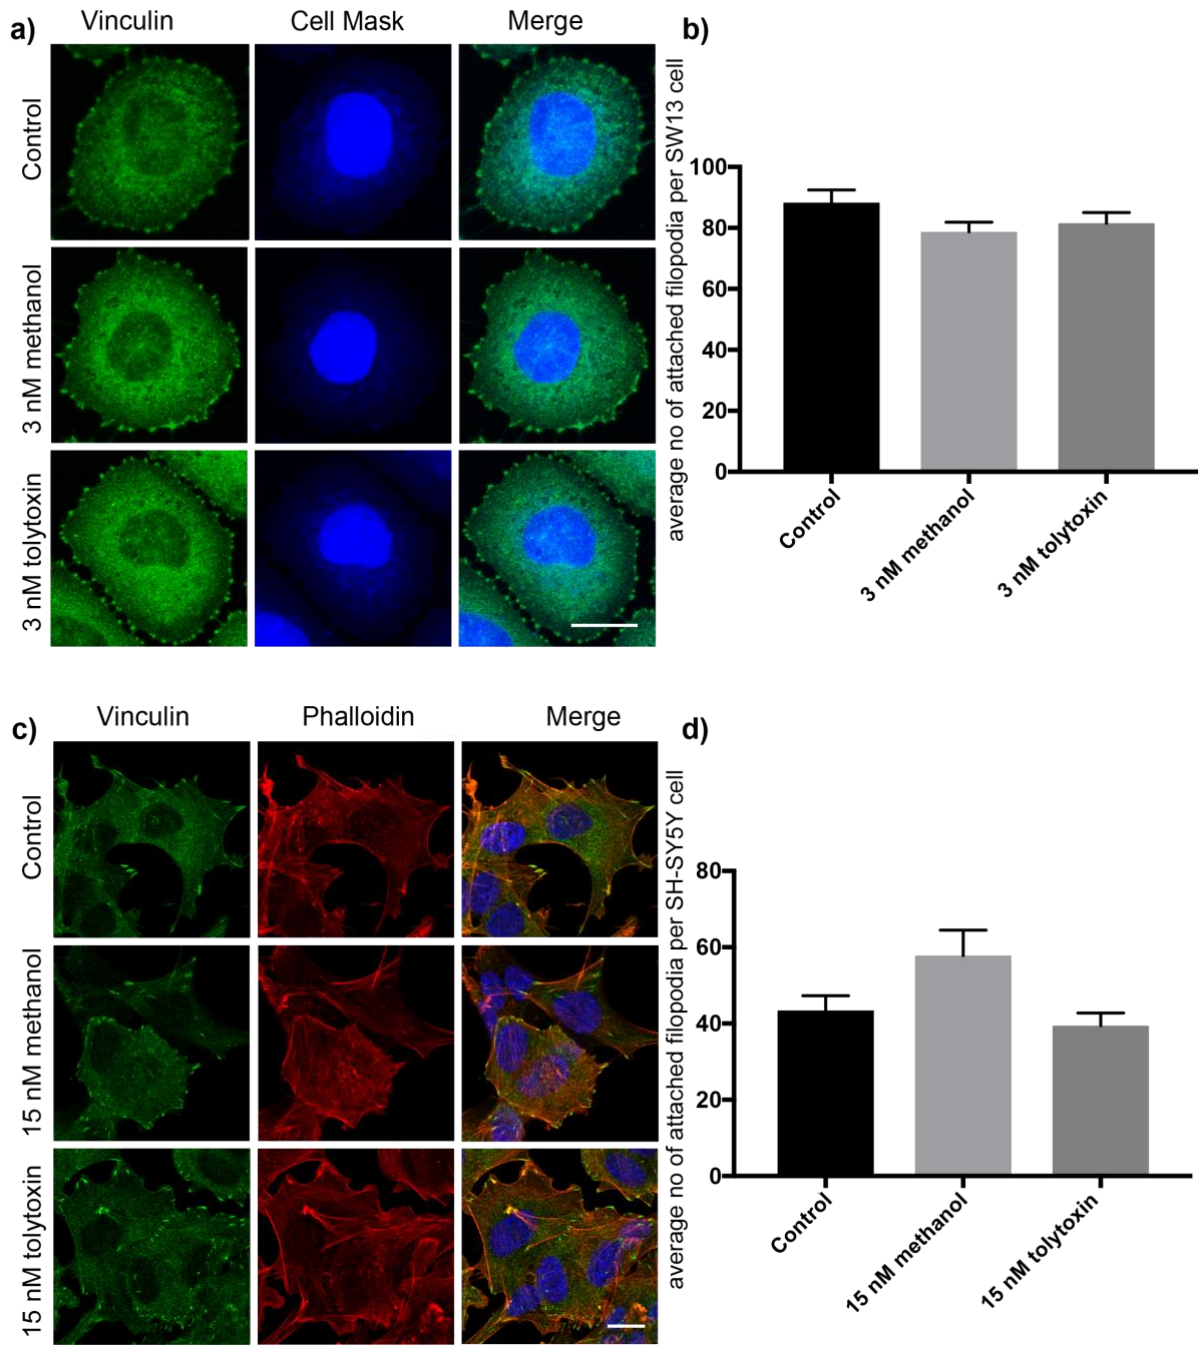

184  
185  
186  
187  
188  
189  
190  
191  
192

193 **Supplementary Figure S4.** Schematic of the experimental design of co-culture experiments.  
194 **a)** Experimental design for DiD vesicle transfer: Donor SW13 cells were either treated 18 h  
195 with 3 nM of methanol or tolytoxin or left untreated. They were labeled with vybrant DiD dye  
196 for 20 min and co-cultured with H2B-GFP transfected acceptor cells for 24 h. **b)** Experimental  
197 design for mitochondria transfer in SW13 cells: Donor cells were transfected with Mito-GFP  
198 plasmid for 24 h and treated either with 3 nM of methanol or tolytoxin or left untreated. They  
199 were then co-cultured with H2B-mCherry transfected acceptor cells for 24 h. **c)** Experimental  
200 design for mitochondria transfer in SH-SY5Y cells: Mito-Dsred expressing SH-SY5Y donor  
201 cells were treated with 15 nM of methanol or tolytoxin or left untreated. They were then co-  
202 cultured with H2B-GFP expressing acceptor cells for 24 h. **d)** Experimental design for  $\alpha$ -syn  
203 fibril transfer: SH-SY5Y donor cells were loaded with Atto-550 tagged  $\alpha$ -syn fibrils for 18h  
204 and then treated with 15 nM of methanol or tolytoxin or left untreated. They were then co-  
205 cultured with GFP transfected acceptor cells for 24 h. **e)** Secretion test: For all the co-culture  
206 experiments performed, secretion test was conducted in parallel by collecting the conditioned  
207 medium of donor cells described in A to D and transferring on top of the suitable acceptor cell  
208 for 24 h.

209  
210  
211  
212  
213  
214  
215  
216  
217  
218  
219  
220  
221  
222

## Supplementary Figure-S4

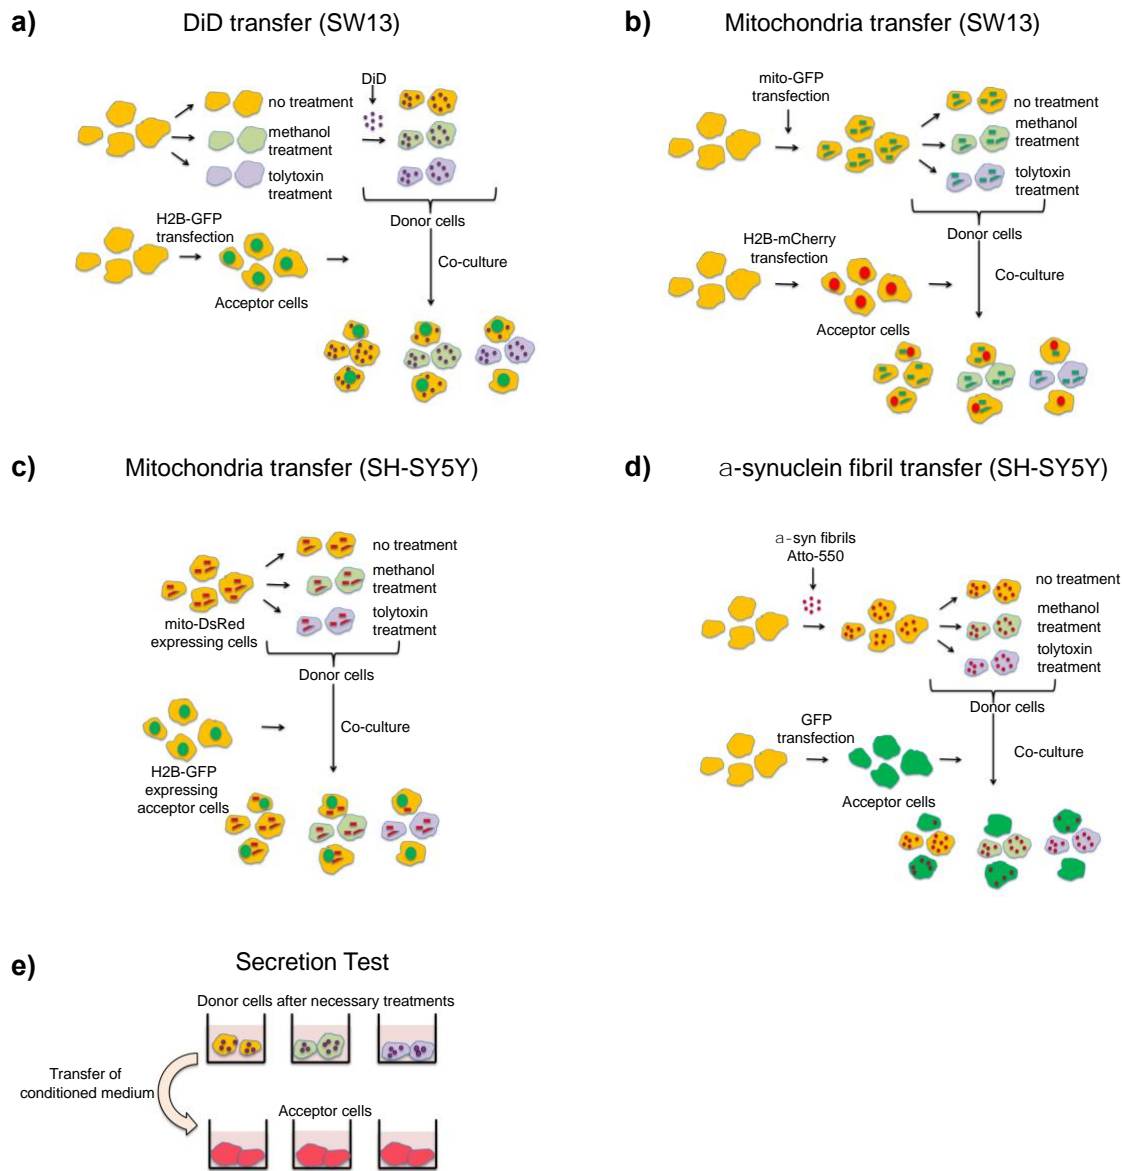

223

224

225 **Supplementary Figure S5.** Tolytoxin decreases the DiD labeled vesicle transfer in SW13 cells.  
226 **a)** Donor cells loaded with vybrant DiD cell labeling solution in Control, 3 nM Me-control and  
227 3 nM tolytoxin co-cultures (left panel), acceptor cells transfected with H2B-mCherry plasmid  
228 (middle panel), donor and acceptor cells that were mixed with 1:1 ratio in different co-culture  
229 conditions (right panel). Arrows indicate DiD-positive vesicles that had been received by  
230 acceptor cells. Scale bar:10  $\mu$ m. **b)** Left graph showing the percentage of DiD transfer in each  
231 co-culture condition. Mean percentage of DiD transfer in control: 63.47%  $\pm$  4.80, Me-control:  
232 58.81%  $\pm$  4.47, 3 nM tolytoxin: 42.4%  $\pm$  5.18 (p=0.777 for Control *versus* 3 nM Me-control,  
233 p=0.0088 for Control *versus* 3 nM tolytoxin, p=0.0453 for 3 nM Me-control *versus* 3 nM  
234 tolytoxin). Right graph showing the average number of DiD vesicles per acceptor cell in each  
235 co-culture condition: Control: 12.49%  $\pm$  1,58, Me-control: 9.31%  $\pm$  0.88, 3 nM tolytoxin:  
236 10.74%  $\pm$  1,52 (p=0.839 for Control *versus* 3 nM Me-control, p=0.585 for Control *versus* 3 nM  
237 tolytoxin, p=0.45 for 3 nM Me-control *versus* 3 nM tolytoxin). Data were collected from three  
238 independent experiments; 50 cells were analysed per condition.  
239

**Supplementary Figure-S5**

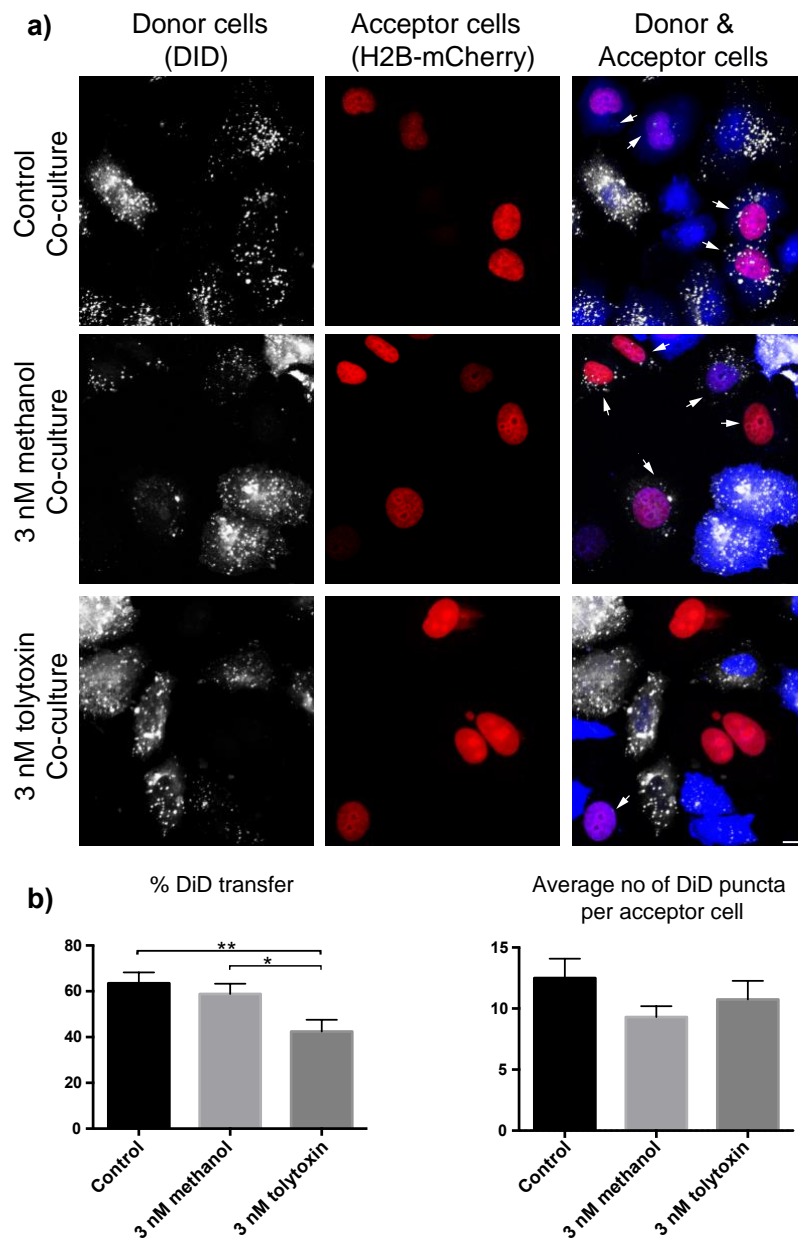

Supplement: 41598_2019_42161_MOESM1_ESM.pdf [file 41598_2019_42161_MOESM1_ESM.pdf]
